# Supplementary material for: Longitudinal tractography of the mouse corpus callosum reveals topographical order and differences due to sex and aging
Source: Research Square preprint supplement (doi:10.21203/rs.3.rs-7177377/v1), 2025-07-28
Supplement: Supplementary file 1 [file f3e63fed60aac5e149ff4077.docx]

## Supplementary material

### Supplementary Figure 1: Placement of CC mask

###
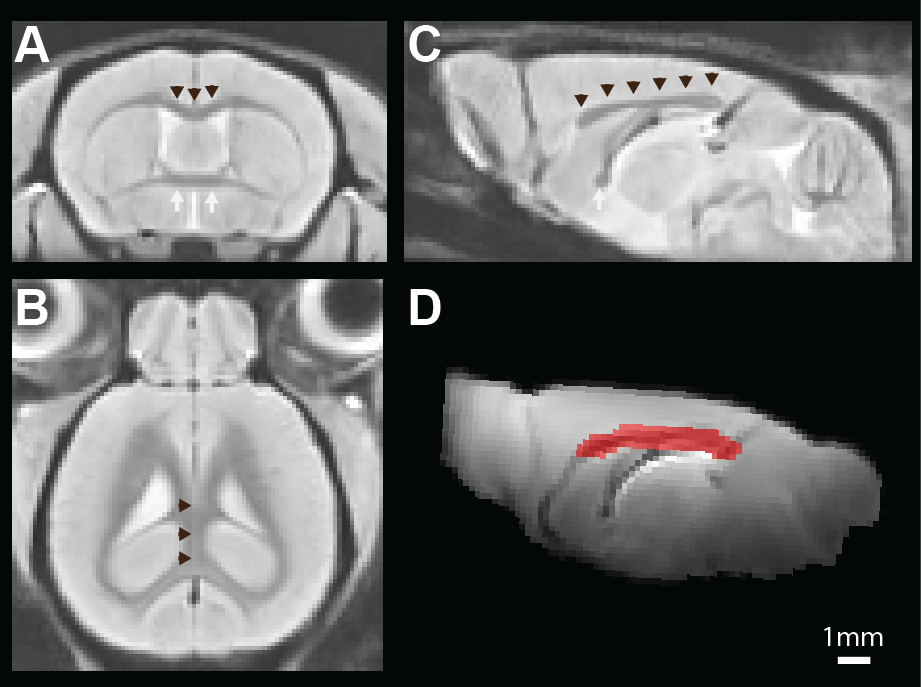


**A-C**: Shows the T1 study-specific template with coronal (A), axial/horizontal (B), and sagittal (C) views. Black arrowheads delineate CC, and white arrows the anterior commissure. The CC mask was manually delineated on the nodif template (D) with a loosely placed border to include surrounding tissue (red ROI in D). The area delineated on the nodif template was 4mm2 compared to the CC area on the T1 template with 2mm2.

### Supplementary Figure 2:


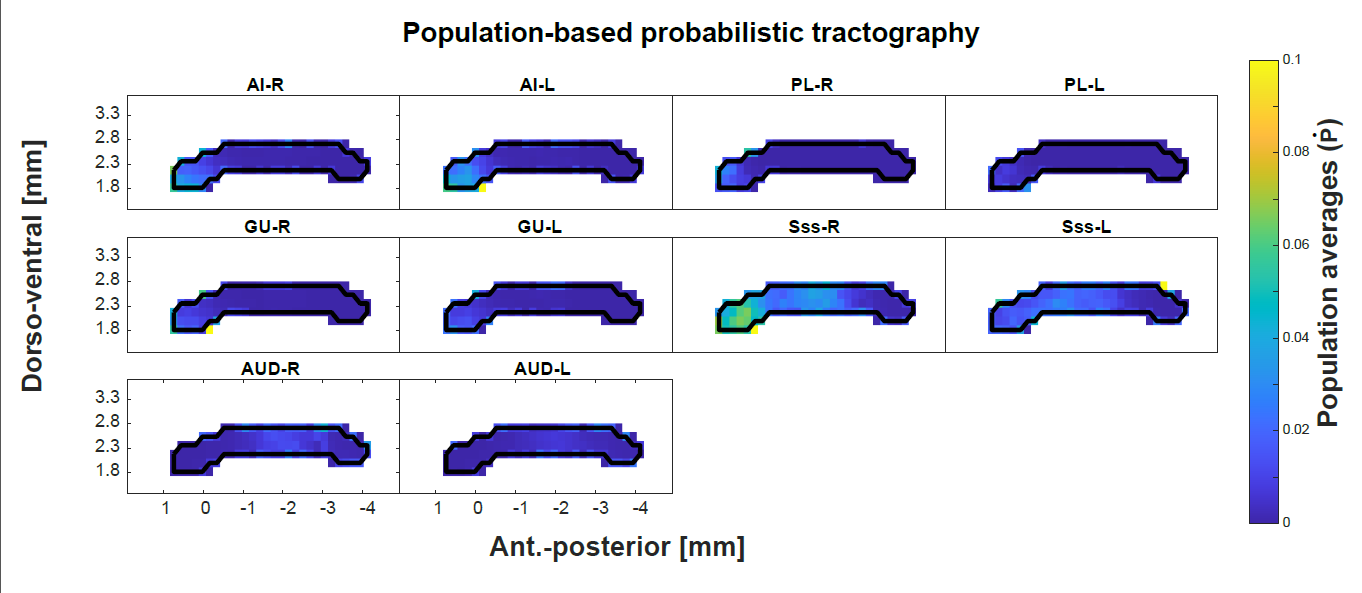


Plot shows population based probabilistic tractography of five ROIs with weaker CC tracts (ROIs not included in Figs 2 and 3).
